# Supplementary material for: Plasmodium vivax Pv12 B-cell epitopes and HLA-DRβ1*-dependent T-cell epitopes in vitro antigenicity
Source: PubMed Central journal article supplement (PMC6130872; doi:10.1371/journal.pone.0203715), 2018-09-10

**A.**

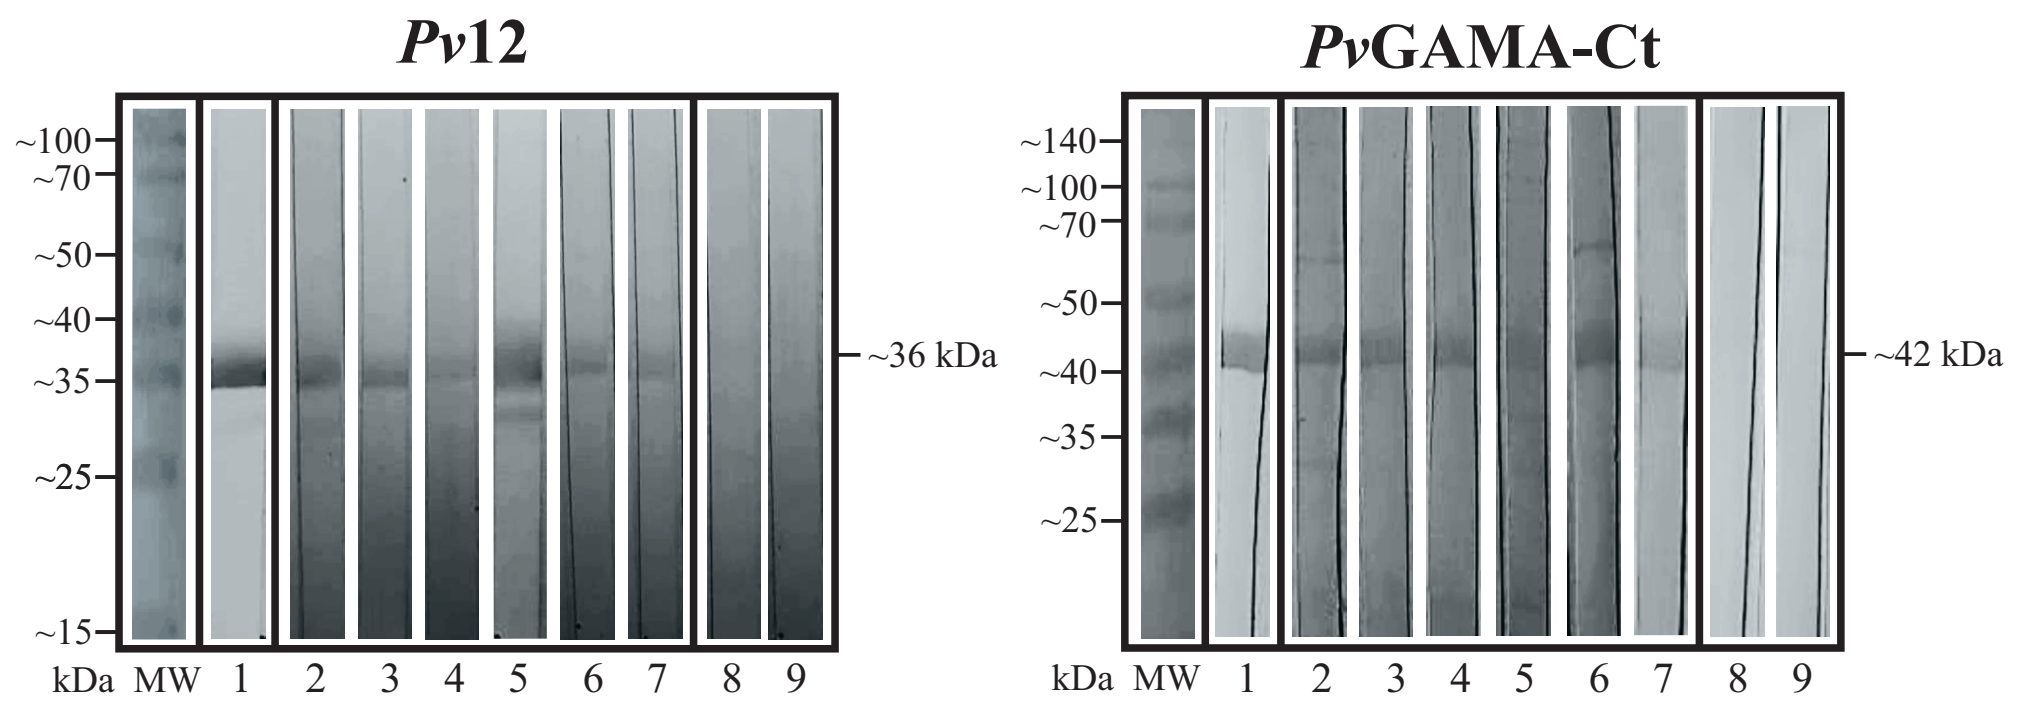

**B.**

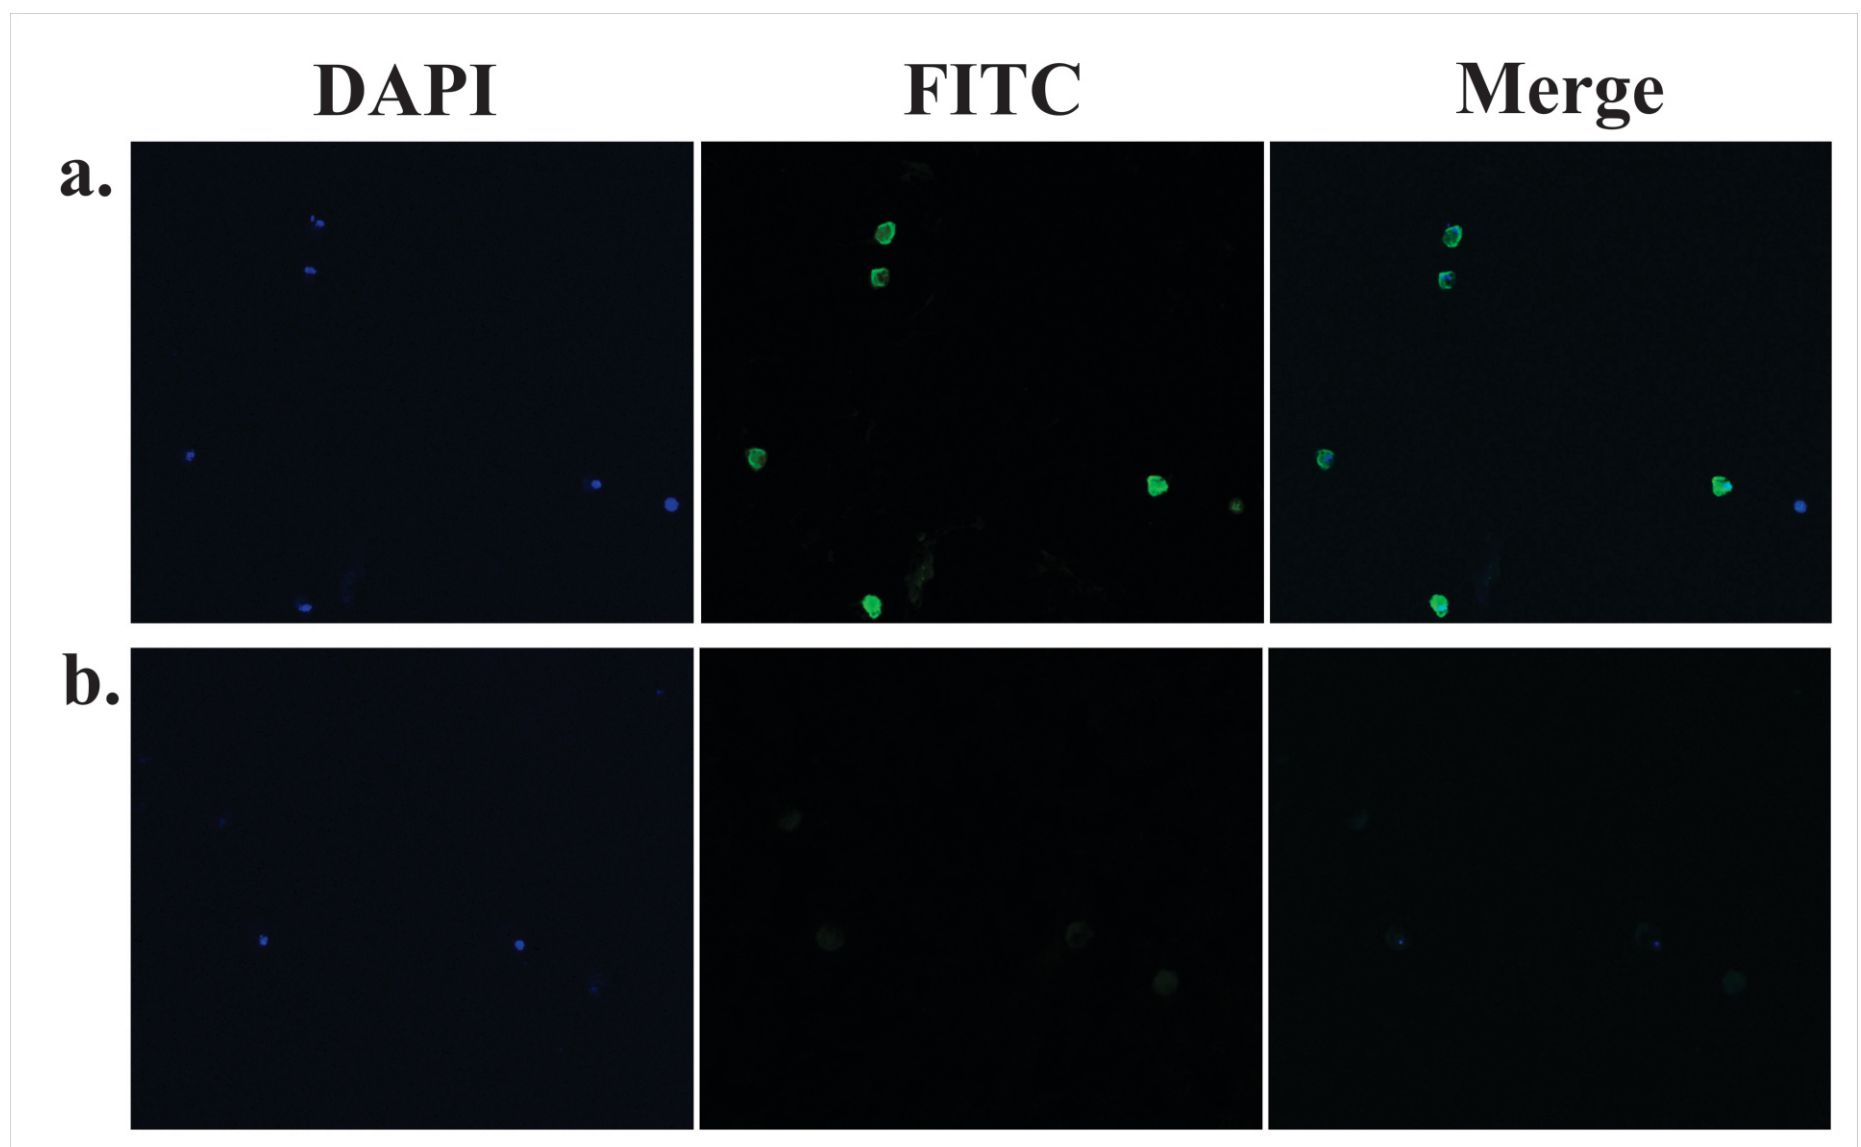

Supplement: pone.0203715.s001.pdf [file pone.0203715.s001.pdf]
