# Supplementary material for: Plasmodium vivax Pv12 B-cell epitopes and HLA-DRβ1*-dependent T-cell epitopes in vitro antigenicity
Source: PubMed Central journal article supplement (PMC6130872; doi:10.1371/journal.pone.0203715), 2018-09-10

### CD4<sup>+</sup> T-cells proliferative response

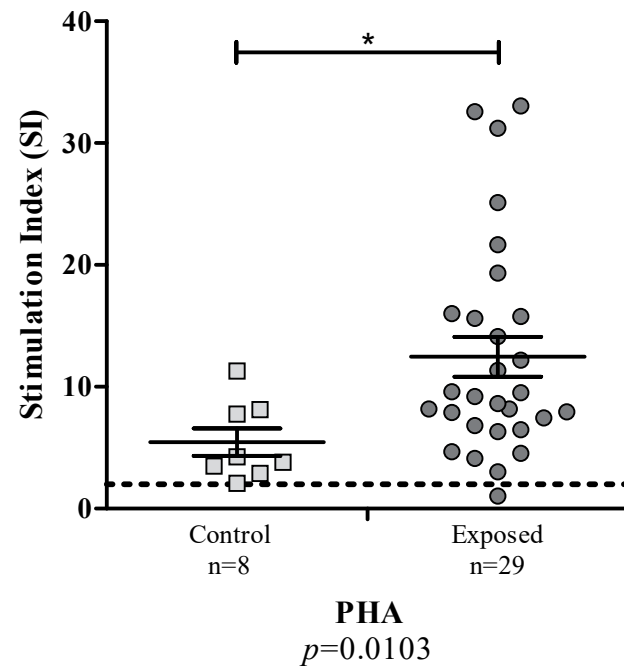

Supplement: pone.0203715.s003.pdf [file pone.0203715.s003.pdf]
