# Supplementary material for: Plasmodium vivax Pv12 B-cell epitopes and HLA-DRβ1*-dependent T-cell epitopes in vitro antigenicity
Source: PubMed Central journal article supplement (PMC6130872; doi:10.1371/journal.pone.0203715), 2018-09-10
Supplement: pone.0203715.s004.pdf [file pone.0203715.s004.pdf]

**B. Pf41 vs. Pv41**

```

Pf41      MKGVI-FCLVLLWRQAWVSSKSHKCDFTKEKYLLSGEKEVSCEIDANPSDDITFICPNK 59
Pv41      MKRLLLLLALLHLVRQQLPAHAEEHICDFTKEKYLLGKNEKEYCVVNAKPFDSVTFICPKK 60
          ** :: :.*: *: :* . :.* ***** . :: : * :.*: * :.*:*****:

Pf41      IDSLCFHTVNISKININQN--KSTMSIQDLLYGSVVYGNLTFISPYVRTNTPFYCFCNLD 116
Pv41      IGAQCFQNVNTLDDISADKMESSKLSIDVLLYGSTLYGDTLLISPTVKQSTTFYCFCNLQ 120
          *.: **:.** :.*: : .*.:**: *****.:**:**:**:** *.: .* *****:

Pf41      TVTIQKFLKINRFLKDDDELSEADVMK--HLK-----GGNVSEAQADEYLNKALNRFKK 168
Pv41      MEDLKKYLKKRRLTKKKNNAKKKSTVNVNDLKNNADEDMEVVVPEKQIDEHLVRALYRVKK 180
          :.*:** .*: *::: : . :.: .** * * * **:* :** *.*

Pf41      MKDLSKFFNDQADNTTKLNL--PKSLNIPNDILNYDVYNSSNNRNDIVVKDEVTKQIIS 226
Pv41      IRNIIEREKNKGGDKSTNQEDEEELVIEEE-----QEEEDGEDEEDESKEVEKIIT 232
          :::: : :.:. . . * :.* * : : . :.: : : ** . :.*:

Pf41      KRGIMSVFVRSNNNVIKGCDFGNNNKNYFSHPISVAGKVNNKVCKIQGKPGELVGFKCAF 286
Pv41      KYGIMKVVVSTNNTITKCDFGNNNVNYFSKPYPVERYGGSKVCRIEAKPGEFVGFKCIY 292
          * **.*.* :**.: ***** *****:* * ..**:*:.***:*:**:

Pf41      EENGKVEPPNCFDQVLHKNKVTDLKTLIPGYASYTNKHSSKYPYYLKIPLHFVNEQYTIQC 346
Pv41      DNQGTVEPHNCFDKVFEHGKETDLQTLMPGYISYGNKQKGYAFYLLKPLHFVQHSYTVQC 352
          :.*.** * **:*:.*: * **:*:** ** * *..** :**:*:**:..**:*

Pf41      KCKSNNS-QNEYTFELDIQPGESEVVLNSFKTS 378
Pv41      KCRSTVHQYDDYVFELAVEGGESDIVAKSFQE- 384
          **:* . :.*:** : : **:*:* :**:

```

Identity: 43%

Similarity (BLOSUM62): 60%

Interaction positions are highlighted in blue
